# Supplementary figures and images for: Differential clinical and CT imaging features of pneumonic-type primary pulmonary lymphoma and pneumonia: a retrospective multicentre observational study
Source: HighWire-hosted journal article supplement (doi:10.1136/bmjopen-2023-077198), 2023-10-01

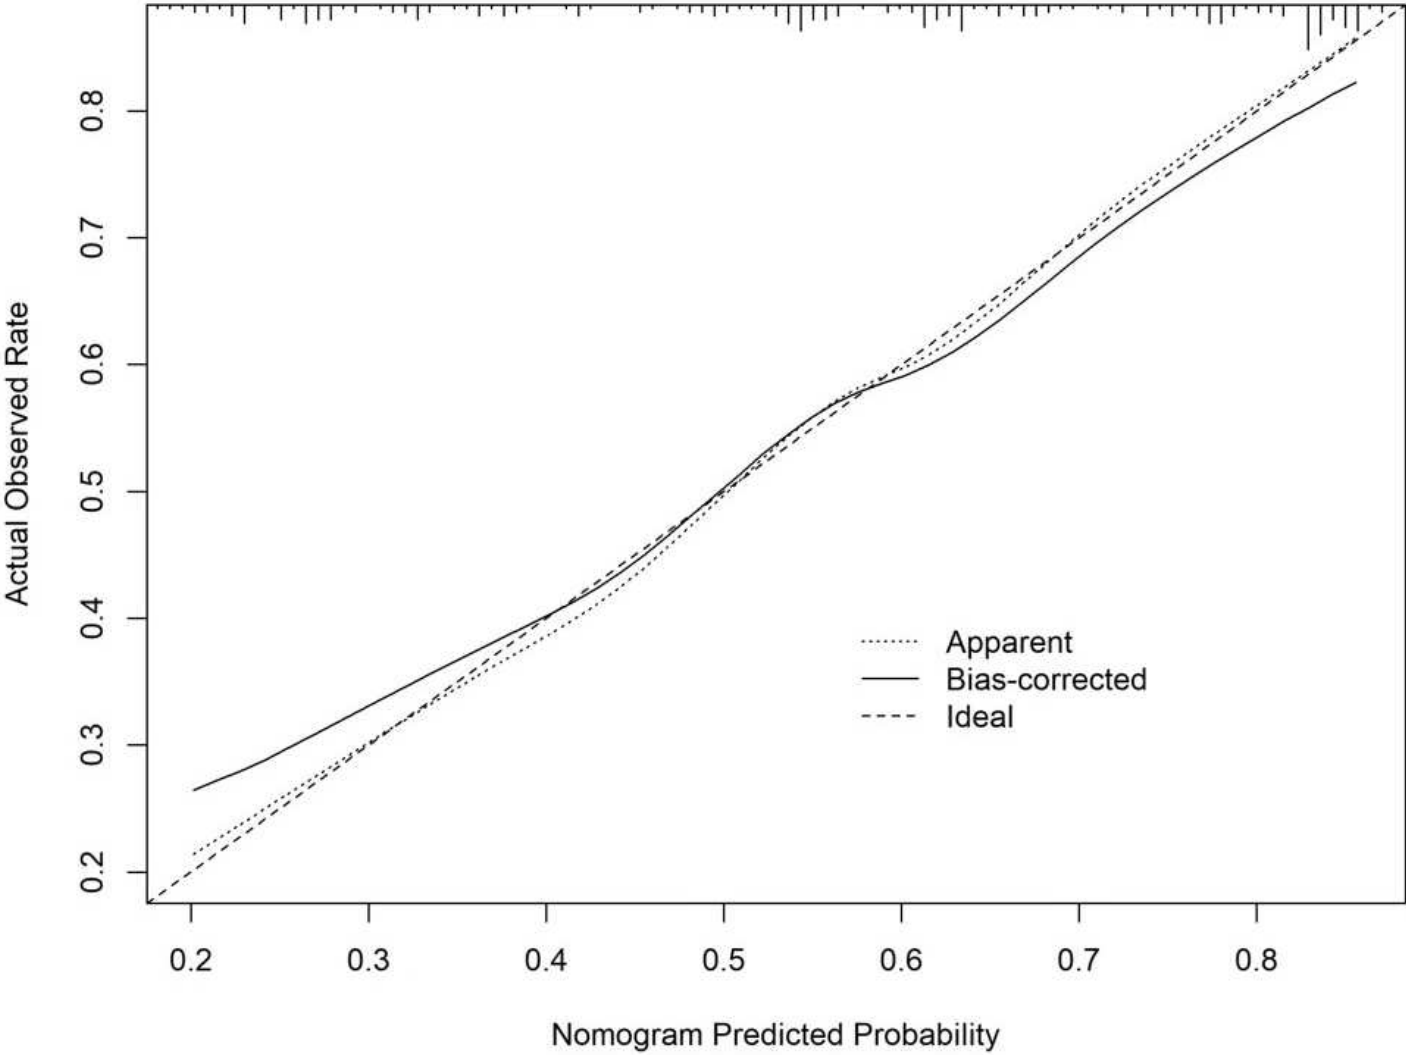

Supplement: bmjopen-2023-077198supp001_data_supplement.pdf [file bmjopen-2023-077198supp001_data_supplement.pdf]

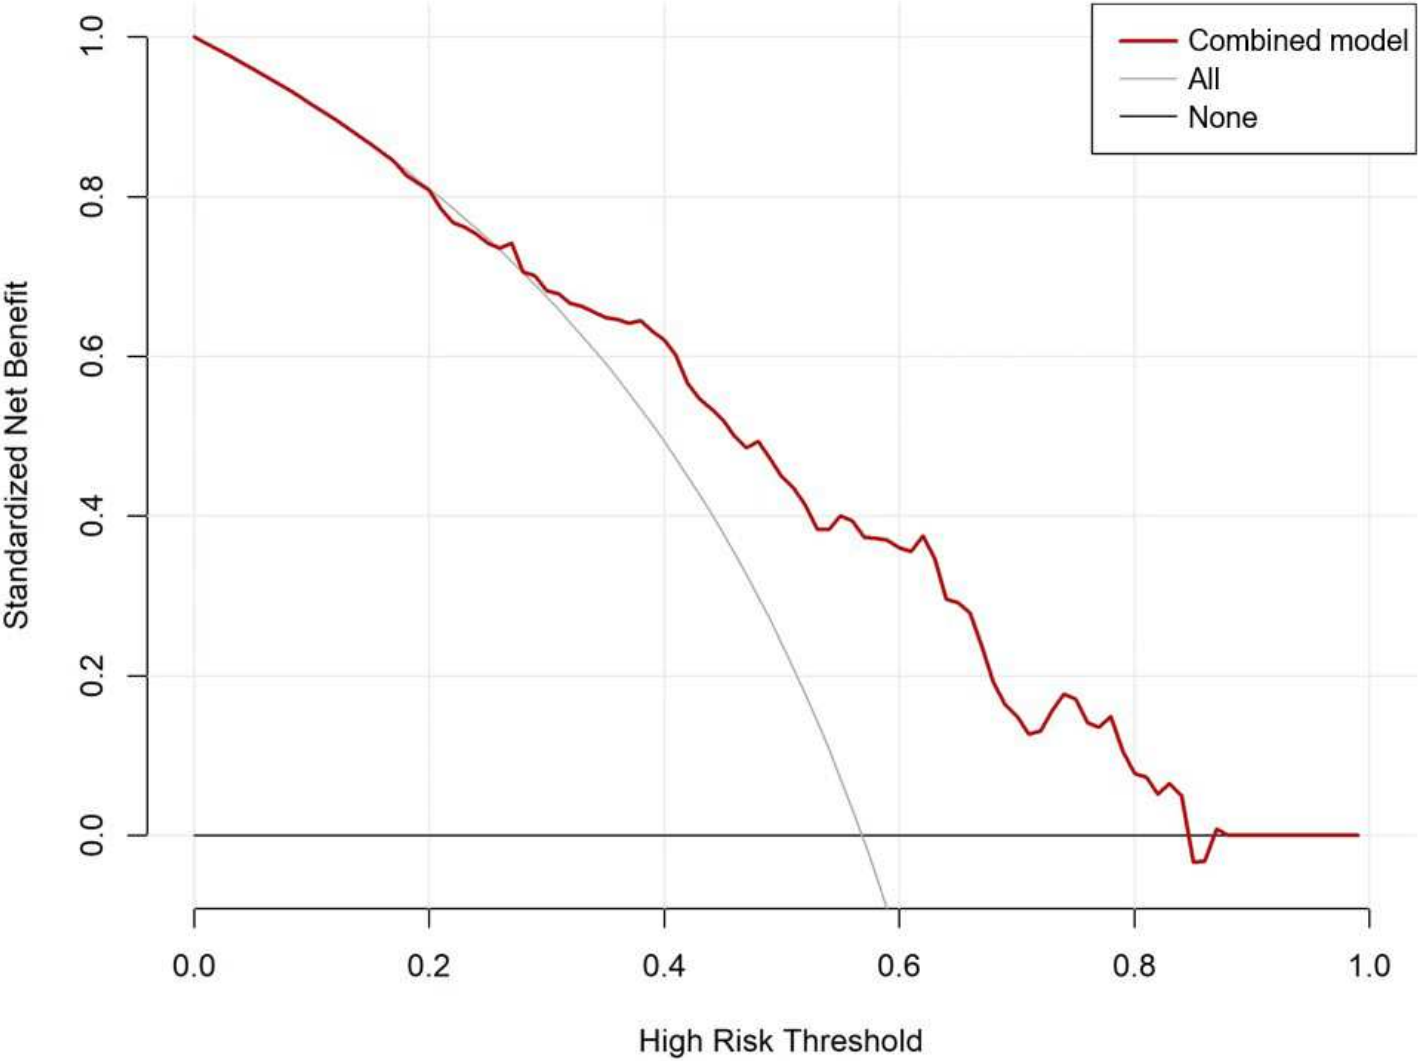

Supplement: bmjopen-2023-077198supp002_data_supplement.pdf [file bmjopen-2023-077198supp002_data_supplement.pdf]
